# Supplementary material for: A European regulatory perspective on cystic fibrosis: current treatments, trends in drug development and translational challenges for CFTR modulators
Source: PubMed Central journal article supplement — Eur Respir Rev. 2018 Apr 13;27(148):170124. doi: 10.1183/16000617.0124-2017 (PMC9488862; doi:10.1183/16000617.0124-2017), 2018-04-13
Supplement: ERR-0124-2017_Supplementary_information.pdf [file ERR-0124-2017_Supplementary_information.pdf]

# A European regulatory perspective on Cystic Fibrosis: current treatments, trends in drug development, and translational challenges for CFTR modulators

Stefano Ponzano,<sup>1,2,\*</sup> Giulia Nigrelli,<sup>1</sup> Laura Fregonese,<sup>1</sup> Irmgard Eichler,<sup>1</sup> Fabio Bertozzi,<sup>2</sup> Tiziano Bandiera,<sup>2</sup> Luis J. V. Galiotta<sup>3</sup> and Marisa Papaluca<sup>1</sup>

<sup>1</sup> European Medicines Agency, 30 Churchill Place, Canary Wharf, London E14 5EU, United Kingdom

<sup>2</sup> D3 PharmaChemistry, Istituto Italiano di Tecnologia, Via Morego 30, I-16163 Genova, Italy.

<sup>3</sup> Telethon Institute of Genetics and Medicine, via Campi Flegrei 34, I-80078 Pozzuoli, Italy

\*Corresponding author:

Stefano Ponzano, PhD

Clinical Pharmacology and Non-clinical Support Office

Specialised Scientific Disciplines Department

European Medicines Agency

30 Churchill Place | Canary Wharf | London E14 5EU | United Kingdom

Tel. +44 (0)20 3660 7814 | [stefano.ponzano@ema.europa.eu](mailto:stefano.ponzano@ema.europa.eu)

**Table a.** List of medicinal products which received positive orphan designation for cystic fibrosis between 2001 and 2016

| Active substance                                                                                                                                             | Date of decision | Authorised medicine name | Product type      |
|--------------------------------------------------------------------------------------------------------------------------------------------------------------|------------------|--------------------------|-------------------|
| sodium nitrite and ethylenediaminetetraacetic acid (EDTA, edetic acid)                                                                                       | 2016             | -                        | Antibacterial     |
| (6aR,10aR)-3-(1',1'-dimethylheptyl)-delta-8-tetrahydrocannabinol-9-carboxylic acid (JBT-101)                                                                 | 2016             | -                        | Anti-inflammatory |
| Fixed-dose combination of fosfomicin disodium and tobramycin                                                                                                 | 2015             | -                        | Antibiotic        |
| Recombinant human acid ceramidase                                                                                                                            | 2015             | -                        | Anti-inflammatory |
| 2-(7-ethoxy-4-(3-fluorophenyl)-1-oxophthalazin-2(1H)-yl)-N-methyl-N-(2-methylbenzo[d]oxazol-6-yl)acetamide                                                   | 2015             | -                        | CFTR modulator    |
| Nitric oxide                                                                                                                                                 | 2015             | -                        | Antibacterial     |
| Amikacin sulfate                                                                                                                                             | 2014             | -                        | Antibiotic        |
| 4-[[[(1S,4S)-5-[[4-[4-(oxazol-2-yl)phenoxy]phenyl]methyl]-2,5-diazabicyclo[2.2.1]hept-2-yl]methyl]benzoic acid                                               | 2014             | -                        | Anti-inflammatory |
| Nitric oxide                                                                                                                                                 | 2014             | -                        | Antibacterial     |
| Lumacaftor / ivacaftor                                                                                                                                       | 2014             | Orkambi                  | CFTR modulator    |
| 1-(2,2-difluoro-1,3-benzodioxol-5-yl)-N-{1-[(2R)-2,3-dihydroxypropyl]-6-fluoro-2-(1-hydroxy-2-methylpropan-2-yl)-1H-indol-5-yl}cyclopropanecarboxamide       | 2014             | -                        | CFTR modulator    |
| Plasmid DNA encoding the human cystic fibrosis transmembrane conductance regulator gene complexed with a non-viral, cationic lipid based gene transfer agent | 2014             | -                        | Gene therapy      |
| 11-(4-Dimethylamino-3-hydroxy-6-methyl-tetrahydropyran-2-yloxy)-2-ethyl-3,4,10-trihydroxy-3,5,6,8,10,12,14-heptamethyl-1-oxa-6-aza-                          | 2014             | -                        | Anti-inflammatory |

| Active substance                                                                                                                                             | Date of decision | Authorised medicine name | Product type                       |
|--------------------------------------------------------------------------------------------------------------------------------------------------------------|------------------|--------------------------|------------------------------------|
| cyclopentadecane-13,15-dione                                                                                                                                 |                  |                          |                                    |
| Cysteamine                                                                                                                                                   | 2014             | -                        | Mucolytic agent                    |
| Nitric oxide                                                                                                                                                 | 2014             | -                        | Antibacterial                      |
| Antisense oligonucleotide targeting the F508delta mutation of CFTR                                                                                           | 2013             | -                        | CFTR modulator                     |
| Pegylated recombinant anti-Pseudomonas aeruginosa antibody                                                                                                   | 2013             | -                        | Antibacterial                      |
| 4,6,4-trimethylangelicin                                                                                                                                     | 2013             | -                        | CFTR modulator + anti-inflammatory |
| Recombinant human CXCL8 mutant                                                                                                                               | 2013             | -                        | Anti-inflammatory                  |
| Alpha-1 proteinase inhibitor                                                                                                                                 | 2012             | -                        | Anti-inflammatory                  |
| Cysteamine                                                                                                                                                   | 2011             | -                        | Mucolytic agent                    |
| Sinapultide, dipalmitoylphosphatidylcholine palmitoyl-oleoyl phosphatidylglycerol, sodium salt and palmitic acid                                             | 2011             | -                        | Mucolytic agent                    |
| Multilamellar microvesicle comprising phosphatidylcholine, sphingomyelin, phosphatidylethanolamine, phosphatidylserine, phosphatidylinositol and cholesterol | 2011             | -                        | Mucolytic agent                    |
| Nafamostat mesilate                                                                                                                                          | 2010             | -                        | Ion-transport modulator            |
| 3-(6-(1-(2,2-Difluorobenzo [d] [1,3] dioxol-5-yl)cyclopropanecarboxamido)-3-methylpyridin-2-yl)benzoic acid (Lumacaftor)                                     | 2010             |                          | CFTR modulator                     |
| Hypothiocyanite / lactoferrin                                                                                                                                | 2009             | -                        | Antibacterial                      |
| Ciprofloxacin                                                                                                                                                | 2009             | -                        | Antibiotic                         |
| Tobramycin                                                                                                                                                   | 2009             | Vantobra®                | Antibiotic                         |
| Avian polyclonal IgY antibody against Pseudomonas aeruginosa                                                                                                 | 2008             | -                        | Antibacterial                      |
| Levofloxacin hemihydrate                                                                                                                                     | 2008             | Quinsair®                | Antibiotic                         |
| N-(2,4-di-tert-butyl-5-hydroxyphenyl)-1,4-dihydro-4-oxoquinoline-3-carboxamide                                                                               | 2008             | Kalydeco®                | CFTR modulator                     |
| Alpha1-proteinase inhibitor                                                                                                                                  | 2007             | -                        | Anti-inflammatory                  |
| Alginate oligosaccharide (G-block) fragment                                                                                                                  | 2007             | -                        | Mucolytic agent                    |
| Ciprofloxacin                                                                                                                                                | 2007             | -                        | Antibiotic                         |
| Amikacin sulfate                                                                                                                                             | 2006             | -                        | Antibiotic                         |
| Heparin sodium                                                                                                                                               | 2006             | -                        | Mucolytic agent                    |
| Tobramycin                                                                                                                                                   | 2006             | -                        | Antibiotic                         |
| Glutathione                                                                                                                                                  | 2006             | -                        | Anti-inflammatory                  |
| Denufosol tetrasodium                                                                                                                                        | 2005             | -                        | Mucolytic agent                    |
| Heparin sodium                                                                                                                                               | 2005             | -                        | Mucolytic agent                    |
| Mannitolum                                                                                                                                                   | 2005             | Bronchitol®              | Mucolytic agent                    |
| 3-[5-(2-Fluoro-phenyl)-[1,2,4]oxadiazole-3-yl]-benzoic acid                                                                                                  | 2005             | -                        | CFTR modulator                     |
| Recombinant human bile-salt-stimulated lipase                                                                                                                | 2005             | -                        | Lipases                            |
| Alpha-1 antitrypsin (inhalation use)                                                                                                                         | 2004             | -                        | Anti-inflammatory                  |
| Dexamethasone sodium phosphate encapsulated in human erythrocytes                                                                                            | 2004             | -                        | Anti-inflammatory                  |

| Active substance                                                                                                                                   | Date of decision | Authorised medicine name | Product type            |
|----------------------------------------------------------------------------------------------------------------------------------------------------|------------------|--------------------------|-------------------------|
| Aztreonam lysinate                                                                                                                                 | 2004             | Cayston®                 | Antibiotic              |
| Temocillin sodium                                                                                                                                  | 2004             | -                        | Antibiotic              |
| Engineered protein inhibitor of human neutrophil elastase                                                                                          | 2003             | -                        | Anti-inflammatory       |
| Recombinant dog gastric lipase                                                                                                                     | 2003             | -                        | Lipases                 |
| Amiloride hydrochloride dihydrate                                                                                                                  | 2003             | -                        | Ion-transport modulator |
| Tobramycin                                                                                                                                         | 2003             | Tobi Podhaler®           | Antibiotic              |
| Duramycin                                                                                                                                          | 2002             | -                        | Ion-transport modulator |
| Carbamic acid (common)/[[4-[[3-[[4-[1-(4-hydroxyphenyl)-1-methyl-ethyl]phenoxy]methyl]phenyl]methoxy]-phenyl]iminomethyl]-,ethyl ester (amelubant) | 2002             | -                        | Anti-inflammatory       |
| Colistimethate sodium                                                                                                                              | 2002             | Colobreathe®             | Antibiotic              |
| Octavalent Pseudomonas aeruginosa O-polysaccharide-toxin A conjugate                                                                               | 2001             | -                        | Antibacterial           |
| 8-Cyclopentyl-1,3-dipropylxanthine                                                                                                                 | 2001             | -                        | CFTR modulator          |
| L-Lysine-N-Acetyl-L-Cysteinate                                                                                                                     | 2001             | -                        | Mucolytic agent         |
